# Supplementary material for: Diverse Roles and Interactions of the SWI/SNF Chromatin Remodeling Complex Revealed Using Global Approaches
Source: PLOS journal article supplement (doi:10.1371/journal.pgen.1002008), 2011-03-03
Supplement: S14 (10.1371/journal.pgen.1002008.s014) [file journal.pgen.1002008.s014]

Chromosome	Start	Stop
chr1	559405	560165
chr1	703968	704521
chr1	795033	795433
chr1	829768	830813
chr1	845307	847096
chr1	848745	851197
chr1	863517	864081
chr1	865089	869497
chr1	883843	884739
chr1	885555	886140
chr1	886396	887100
chr1	891143	893633
chr1	901210	902024
chr1	915006	915591
chr1	923287	927523
chr1	931463	932564
chr1	938211	939638
chr1	944304	945108
chr1	945157	945914
chr1	946001	947519
chr1	948750	949341
chr1	949694	950455
chr1	962922	963350
chr1	977330	977857
chr1	981251	982147
chr1	984049	985471
chr1	988138	990122
chr1	993902	995309
chr1	995478	995938
chr1	998542	1000499
chr1	1004464	1005966
chr1	1006607	1007179
chr1	1040880	1042267
chr1	1047416	1047957
chr1	1082609	1083588
chr1	1083609	1084083
chr1	1133375	1133946
chr1	1143415	1143934
chr1	1147934	1148724
chr1	1154902	1155581
chr1	1156227	1158510
chr1	1161967	1165906
chr1	1169502	1170012
chr1	1170379	1170881
chr1	1186393	1186920
chr1	1197721	1200556
chr1	1206675	1207286
chr1	1207347	1207981
chr1	1208990	1209491
chr1	1215395	1216697
chr1	1216848	1217606
chr1	1224214	1224703
chr1	1225498	1225922
chr1	1228293	1228785
chr1	1229625	1231485
chr1	1231567	1235434
chr1	1236407	1236932
chr1	1237392	1237897
chr1	1243348	1243923
chr1	1244127	1245053
chr1	1249343	1251147
chr1	1252121	1252558
chr1	1254125	1257247
chr1	1257876	1260888
chr1	1261106	1261567
chr1	1263561	1263979
chr1	1265774	1266474
chr1	1269564	1271239
chr1	1271288	1271850
chr1	1272493	1274562
chr1	1274675	1275376
chr1	1276670	1277436
chr1	1278619	1279250
chr1	1286451	1286910
chr1	1296065	1296514
chr1	1297106	1297792
chr1	1299615	1301103
chr1	1312254	1312774
chr1	1323315	1323853
chr1	1324029	1326447
chr1	1327026	1327893
chr1	1331452	1333457
chr1	1359055	1359562
chr1	1396417	1397071
chr1	1436520	1437642
chr1	1486881	1487318
chr1	1499143	1500946
chr1	1519709	1520206
chr1	1522339	1523334
chr1	1540224	1541877
chr1	1542024	1542481
chr1	1545149	1545555
chr1	1552288	1553603
chr1	1553723	1554127
chr1	1601612	1602019
chr1	1614066	1614497
chr1	1645371	1645990
chr1	1679335	1681522
chr1	1685069	1685970
chr1	1699142	1700747
chr1	1701494	1701974
chr1	1703703	1704489
chr1	1710203	1710630
chr1	1779866	1780285
chr1	1810990	1813400
chr1	1813401	1813818
chr1	1815908	1816505
chr1	1818398	1818987
chr1	1827420	1828096
chr1	1829617	1830946
chr1	1839952	1841468
chr1	1865018	1865907
chr1	1880937	1881954
chr1	1889484	1890383
chr1	1936308	1936720
chr1	1965914	1966621
chr1	1967608	1968283
chr1	1970550	1972471
chr1	2025744	2026797
chr1	2042402	2043001
chr1	2053864	2055351
chr1	2061039	2061931
chr1	2091801	2092357
chr1	2095427	2096139
chr1	2101383	2101987
chr1	2110532	2111479
chr1	2115761	2117154
chr1	2125284	2126314
chr1	2126809	2127238
chr1	2128091	2130724
chr1	2131165	2131598
chr1	2131858	2132448
chr1	2133312	2135222
chr1	2145391	2145850
chr1	2147590	2149161
chr1	2149836	2153333
chr1	2153449	2154039
chr1	2155003	2156305
chr1	2164261	2165084
chr1	2176024	2176478
chr1	2178487	2178946
chr1	2190521	2190957
chr1	2216683	2217162
chr1	2232618	2233387
chr1	2235449	2236210
chr1	2236632	2237147
chr1	2251939	2252398
chr1	2293996	2294493
chr1	2297194	2297632
chr1	2302904	2303675
chr1	2303753	2304838
chr1	2304914	2305492
chr1	2311245	2312027
chr1	2312172	2313940
chr1	2317781	2318269
chr1	2318732	2319144
chr1	2327808	2328399
chr1	2332993	2336156
chr1	2389165	2389883
chr1	2414820	2416117
chr1	2420252	2420742
chr1	2420788	2422097
chr1	2446805	2449043
chr1	2455899	2456695
chr1	2458254	2458825
chr1	2462886	2463561
chr1	2463707	2464212
chr1	2467113	2469857
chr1	2486981	2487447
chr1	2505231	2505678
chr1	2506585	2508816
chr1	2575246	2575772
chr1	2611713	2612195
chr1	2618903	2619318
chr1	2678657	2679162
chr1	2828429	2828896
chr1	3219171	3220490
chr1	3226017	3226637
chr1	3359437	3362192
chr1	3362440	3363036
chr1	3366811	3367380
chr1	3375433	3375961
chr1	3376560	3377700
chr1	3382107	3383139
chr1	3383297	3391142
chr1	3391187	3391853
chr1	3395641	3396181
chr1	3397320	3398051
chr1	3398112	3398887
chr1	3398901	3399568
chr1	3401252	3401691
chr1	3401961	3402552
chr1	3407565	3411973
chr1	3416047	3418853
chr1	3423764	3424337
chr1	3426379	3427074
chr1	3429020	3429511
chr1	3430362	3430805
chr1	3430840	3431270
chr1	3431483	3432080
chr1	3435807	3439080
chr1	3440328	3440757
chr1	3444186	3444730
chr1	3447790	3448268
chr1	3448630	3450680
chr1	3450795	3451386
chr1	3452020	3452819
chr1	3453324	3455243
chr1	3461115	3462194
chr1	3466870	3467396
chr1	3471855	3472329
chr1	3518272	3518763
chr1	3519007	3520736
chr1	3521438	3522358
chr1	3524969	3526051
chr1	3529730	3530298
chr1	3530410	3532498
chr1	3555737	3556809
chr1	3575012	3575909
chr1	3576052	3576532
chr1	3577495	3577985
chr1	3578127	3578805
chr1	3630744	3631188
chr1	3653466	3654014
chr1	3678331	3678857
chr1	3679682	3680238
chr1	3682203	3682690
chr1	3702223	3703430
chr1	3717655	3718102
chr1	3762840	3765142
chr1	3774750	3775470
chr1	3794601	3795049
chr1	3805742	3808126
chr1	3817155	3817746
chr1	4007921	4008542
chr1	4233673	4234432
chr1	4544904	4545503
chr1	5492411	5493070
chr1	5649730	5650525
chr1	5652424	5653224
chr1	5653697	5654565
chr1	5728286	5729066
chr1	5829769	5830413
chr1	5850323	5850966
chr1	5851197	5851841
chr1	5856311	5856889
chr1	5862317	5862939
chr1	5892436	5893035
chr1	5910124	5911138
chr1	5920516	5921230
chr1	5931923	5932754
chr1	5957691	5958455
chr1	5959746	5960570
chr1	5962737	5964149
chr1	5972205	5972787
chr1	5973855	5977356
chr1	5982298	5982887
chr1	5997937	5998527
chr1	5998738	5999698
chr1	6007644	6009393
chr1	6009789	6010271
chr1	6027735	6028193
chr1	6083755	6084353
chr1	6110044	6111816
chr1	6111850	6112315
chr1	6130980	6131937
chr1	6139774	6141133
chr1	6144121	6144907
chr1	6165555	6166084
chr1	6175986	6176552
chr1	6181409	6183216
chr1	6187373	6190369
chr1	6192339	6192807
chr1	6206215	6206671
chr1	6207370	6208474
chr1	6217765	6219566
chr1	6226172	6226645
chr1	6227528	6228459
chr1	6228691	6229897
chr1	6239242	6239918
chr1	6240160	6240632
chr1	6242143	6243693
chr1	6243794	6244339
chr1	6255918	6256402
chr1	6291639	6292048
chr1	6299946	6300473
chr1	6314340	6314788
chr1	6325972	6326659
chr1	6330451	6331044
chr1	6336258	6337392
chr1	6367960	6369285
chr1	6375180	6377095
chr1	6387209	6387735
chr1	6396795	6397610
chr1	6402486	6403166
chr1	6404358	6404795
chr1	6405893	6407396
chr1	6409737	6410792
chr1	6446697	6447615
chr1	6454026	6455544
chr1	6457343	6457865
chr1	6457998	6458713
chr1	6468921	6469639
chr1	6472277	6475292
chr1	6479985	6480653
chr1	6508745	6509295
chr1	6536382	6537598
chr1	6561947	6563702
chr1	6564697	6565144
chr1	6570585	6571080
chr1	6582872	6586631
chr1	6586742	6587214
chr1	6595146	6597296
chr1	6607230	6608776
chr1	6616993	6617821
chr1	6683523	6685000
chr1	6707172	6707664
chr1	6766590	6768269
chr1	6768361	6769366
chr1	6940825	6941395
chr1	6942712	6943708
chr1	6943778	6944953
chr1	6945159	6947307
chr1	6980861	6981488
chr1	7025085	7025623
chr1	7028804	7029414
chr1	7057819	7058514
chr1	7099896	7101064
chr1	7247506	7248079
chr1	7248412	7249874
chr1	7267101	7267644
chr1	7281729	7283204
chr1	7283422	7284816
chr1	7295781	7296380
chr1	7317413	7318480
chr1	7328087	7328672
chr1	7348703	7349215
chr1	7361370	7361969
chr1	7362058	7362817
chr1	7366655	7367211
chr1	7371212	7371833
chr1	7384293	7385176
chr1	7386909	7387602
chr1	7402136	7402735
chr1	7427980	7428491
chr1	7430749	7431323
chr1	7451467	7453168
chr1	7453186	7455400
chr1	7456998	7457530
chr1	7461370	7462175
chr1	7474482	7475026
chr1	7483686	7484193
chr1	7490192	7490783
chr1	7509005	7509805
chr1	7521579	7522883
chr1	7531640	7534691
chr1	7534745	7535783
chr1	7543735	7544281
chr1	7598838	7599508
chr1	7628223	7628796
chr1	7629377	7629937
chr1	7650129	7650680
chr1	7710572	7711262
chr1	7753344	7754840
chr1	7765589	7767498
chr1	7792337	7792863
chr1	7792980	7793476
chr1	7827138	7827670
chr1	7936298	7937491
chr1	7943640	7944985
chr1	7957753	7958466
chr1	7968448	7969047
chr1	7986544	7988524
chr1	7993540	7994292
chr1	8005848	8006317
chr1	8007602	8010135
chr1	8029043	8029642
chr1	8043700	8044312
chr1	8057845	8058823
chr1	8059664	8060431
chr1	8073624	8074311
chr1	8076840	8077486
chr1	8098213	8099610
chr1	8100565	8101450
chr1	8104711	8105232
chr1	8115699	8116325
chr1	8126938	8127389
chr1	8138183	8138752
chr1	8151932	8152521
chr1	8156883	8158021
chr1	8180021	8181107
chr1	8183986	8186336
chr1	8191450	8191930
chr1	8193569	8196221
chr1	8241980	8242881
chr1	8258877	8259368
chr1	8296378	8297466
chr1	8298054	8298571
chr1	8312382	8312877
chr1	8325543	8327017
chr1	8331325	8332122
chr1	8334046	8334802
chr1	8421430	8421988
chr1	8477271	8477888
chr1	8479033	8479587
chr1	8508439	8509038
chr1	8535302	8536262
chr1	8684079	8685287
chr1	8685288	8686545
chr1	8716006	8716800
chr1	8799358	8801005
chr1	8808347	8809013
chr1	8831177	8832057
chr1	8844810	8845724
chr1	8855622	8857177
chr1	8859111	8862348
chr1	8862726	8863430
chr1	8866071	8866626
chr1	8871704	8873115
chr1	8873500	8873980
chr1	8886399	8887024
chr1	8945438	8946107
chr1	8956558	8957321
chr1	8967654	8968235
chr1	8968695	8969376
chr1	8970673	8971300
chr1	8987225	8988258
chr1	8988413	8988980
chr1	8992479	8993175
chr1	9044228	9044736
chr1	9049485	9050584
chr1	9061434	9062006
chr1	9063296	9063748
chr1	9067122	9067606
chr1	9092301	9092789
chr1	9093106	9094028
chr1	9110366	9112761
chr1	9124771	9125298
chr1	9127608	9128400
chr1	9141159	9141761
chr1	9145184	9146762
chr1	9163093	9163539
chr1	9163721	9165432
chr1	9176484	9177080
chr1	9178648	9179697
chr1	9196397	9196818
chr1	9215638	9216563
chr1	9216611	9218179
chr1	9220633	9221124
chr1	9222126	9222875
chr1	9224974	9225946
chr1	9232441	9233040
chr1	9249568	9250258
chr1	9251857	9252300
chr1	9253057	9253505
chr1	9253990	9254464
chr1	9258135	9258625
chr1	9262934	9263529
chr1	9272642	9273702
chr1	9274230	9276837
chr1	9277243	9278275
chr1	9282651	9283598
chr1	9285254	9285944
chr1	9298041	9299435
chr1	9332946	9333547
chr1	9338469	9339039
chr1	9367386	9368039
chr1	9368167	9369532
chr1	9370017	9370450
chr1	9370748	9371964
chr1	9383053	9383867
chr1	9393482	9394253
chr1	9395913	9396536
chr1	9411196	9412014
chr1	9421133	9422138
chr1	9438405	9439000
chr1	9455654	9456310
chr1	9473615	9474208
chr1	9477898	9478546
chr1	9521217	9523234
chr1	9570864	9573074
chr1	9597608	9598705
chr1	9609384	9610324
chr1	9671416	9672259
chr1	9701139	9702290
chr1	9702511	9703050
chr1	9703860	9704437
chr1	9707514	9708098
chr1	9774916	9775379
chr1	9805361	9808754
chr1	9850048	9850737
chr1	9857438	9858093
chr1	9860400	9861159
chr1	9868687	9869286
chr1	9891603	9892072
chr1	9892099	9893762
chr1	9925315	9926498
chr1	9932837	9933472
chr1	10014824	10016722
chr1	10135343	10135881
chr1	10162452	10162920
chr1	10192270	10194565
chr1	10380801	10383132
chr1	10410568	10411092
chr1	10411613	10412161
chr1	10412563	10414203
chr1	10454275	10455568
chr1	10457215	10458575
chr1	10477309	10477824
chr1	10489625	10490218
chr1	10493211	10493976
chr1	10523900	10524440
chr1	10616742	10618824
chr1	10626545	10627377
chr1	10657449	10658046
chr1	10662919	10664500
chr1	10668806	10669793
chr1	10674936	10675430
chr1	10676265	10678301
chr1	10728304	10729011
chr1	10738494	10739144
chr1	10761789	10762411
chr1	10813563	10814222
chr1	10818287	10819100
chr1	10819368	10820427
chr1	10842792	10843327
chr1	10849759	10850481
chr1	10881027	10881677
chr1	10882279	10882871
chr1	10882966	10884763
chr1	10892640	10893226
chr1	10924537	10925081
chr1	10943464	10944171
chr1	10948062	10948976
chr1	10958171	10959161
chr1	10962693	10963265
chr1	10994863	10996160
chr1	11020226	11020678
chr1	11028777	11029725
chr1	11034589	11037286
chr1	11041683	11043385
chr1	11053383	11053972
chr1	11081727	11083062
chr1	11116772	11117454
chr1	11244682	11245813
chr1	11255690	11256846
chr1	11456207	11456715
chr1	11461293	11462238
chr1	11466419	11466869
chr1	11533126	11533852
chr1	11618358	11618946
chr1	11632786	11633461
chr1	11635060	11636329
chr1	11637018	11637613
chr1	11643556	11644148
chr1	11647211	11647746
chr1	11654416	11655045
chr1	11662854	11664784
chr1	11667858	11668279
chr1	11675577	11676862
chr1	11690086	11690542
chr1	11693763	11694402
chr1	11701979	11702819
chr1	11703876	11704374
chr1	11711203	11711681
chr1	11712439	11713593
chr1	11715094	11715638
chr1	11718211	11719868
chr1	11729423	11729950
chr1	11731550	11732678
chr1	11734959	11735555
chr1	11737435	11737917
chr1	11750477	11751189
chr1	11766987	11768458
chr1	11769768	11771808
chr1	11772115	11774435
chr1	11783329	11784083
chr1	11785241	11786707
chr1	11787482	11789383
chr1	11820880	11821806
chr1	11841613	11842403
chr1	11865341	11865940
chr1	11876352	11877063
chr1	11888658	11889146
chr1	11890705	11892711
chr1	11901494	11902006
chr1	11907587	11908017
chr1	11908883	11909417
chr1	11913585	11914152
chr1	11916487	11917893
chr1	11949692	11950330
chr1	11961954	11963721
chr1	11964142	11964634
chr1	11984483	11985181
chr1	12001562	12002934
chr1	12013598	12014505
chr1	12034373	12035489
chr1	12050604	12051191
chr1	12054796	12055370
chr1	12108478	12108987
chr1	12114545	12115290
chr1	12115487	12116198
chr1	12116639	12117234
chr1	12118177	12118814
chr1	12125458	12127311
chr1	12127379	12128353
chr1	12132937	12134022
chr1	12135424	12136515
chr1	12141044	12141827
chr1	12142367	12143037
chr1	12143615	12145765
chr1	12147203	12147864
chr1	12151032	12151826
chr1	12152503	12153431
chr1	12160352	12161260
chr1	12161744	12162221
chr1	12165170	12165815
chr1	12166959	12167765
chr1	12168738	12169716
chr1	12171050	12171614
chr1	12191780	12192347
chr1	12212048	12214128
chr1	12460596	12462042
chr1	12463314	12464240
chr1	12501381	12501963
chr1	12502000	12502707
chr1	12507890	12508807
chr1	12509970	12511795
chr1	12521693	12524289
chr1	12524693	12525292
chr1	12529189	12529751
chr1	12529929	12531047
chr1	12531252	12533615
chr1	12534586	12535267
chr1	12535453	12536136
chr1	12538716	12539472
chr1	12552529	12553070
chr1	12553380	12553951
chr1	12555063	12557517
chr1	12561544	12562276
chr1	12562576	12563448
chr1	12568089	12568591
chr1	12572533	12573064
chr1	12574299	12576055
chr1	12576071	12578239
chr1	12578281	12579786
chr1	12582429	12583477
chr1	12583622	12584383
chr1	12584452	12585372
chr1	12585870	12586732
chr1	12586968	12587569
chr1	12598234	12602969
chr1	12605109	12605644
chr1	12614161	12614690
chr1	13947605	13949474
chr1	14012557	14013184
chr1	14159343	14160172
chr1	14990560	14991272
chr1	15114297	15114981
chr1	15218905	15219374
chr1	15245535	15246082
chr1	15299299	15299927
chr1	15327552	15328109
chr1	15338663	15339295
chr1	15351238	15353990
chr1	15357325	15357827
chr1	15377102	15377624
chr1	15377927	15378529
chr1	15399683	15400332
chr1	15445976	15446443
chr1	15471337	15472087
chr1	15482557	15483056
chr1	15488498	15488924
chr1	15503557	15504186
chr1	15513611	15514191
chr1	15522174	15523055
chr1	15523539	15524114
chr1	15526361	15526801
chr1	15535908	15537427
chr1	15538084	15538652
chr1	15539186	15539789
chr1	15540974	15541553
chr1	15544149	15545849
chr1	15548958	15550235
chr1	15551258	15552648
chr1	15553195	15554299
chr1	15554499	15555029
chr1	15555241	15555879
chr1	15555973	15556540
chr1	15607925	15611206
chr1	15614787	15615924
chr1	15616036	15617214
chr1	15618043	15619026
chr1	15620107	15621202
chr1	15621994	15622622
chr1	15623194	15624024
chr1	15624705	15627022
chr1	15627384	15629308
chr1	15629786	15633227
chr1	15634148	15635238
chr1	15650350	15650879
chr1	15658673	15659857
chr1	15661613	15663056
chr1	15663187	15663648
chr1	15700437	15700932
chr1	15721593	15725083
chr1	15725400	15726699
chr1	15777910	15778366
chr1	15783446	15784550
chr1	15802097	15803085
chr1	15816136	15817472
chr1	15879066	15880500
chr1	15881940	15882524
chr1	15882701	15884383
chr1	15902077	15902614
chr1	15902678	15903185
chr1	15935395	15935985
chr1	15940297	15941087
chr1	15948383	15948982
chr1	15954571	15955213
chr1	15955237	15955979
chr1	15956495	15956952
chr1	15957835	15958306
chr1	15959675	15960189
chr1	15963028	15963512
chr1	15963628	15964102
chr1	15964428	15964919
chr1	15984638	15985119
chr1	15987747	15988384
chr1	15990928	15991641
chr1	15994597	15995399
chr1	15996682	15997184
chr1	15997951	16000593
chr1	16032078	16032824
chr1	16033241	16035586
chr1	16046035	16049483
chr1	16085172	16085830
chr1	16138304	16138707
chr1	16140180	16140631
chr1	16148358	16149773
chr1	16150460	16152346
chr1	16152352	16153003
chr1	16174278	16175509
chr1	16207913	16208509
chr1	16211420	16213170
chr1	16214897	16215640
chr1	16231688	16232504
chr1	16247589	16248322
chr1	16250176	16250770
chr1	16255118	16255717
chr1	16271226	16271712
chr1	16271912	16273372
chr1	16274293	16276803
chr1	16277868	16279146
chr1	16281249	16282031
chr1	16321553	16322152
chr1	16337583	16339685
chr1	16340598	16341192
chr1	16342213	16346743
chr1	16348864	16349497
chr1	16349937	16350794
chr1	16352474	16356432
chr1	16357707	16358919
chr1	16363042	16365163
chr1	16366177	16367339
chr1	16367633	16368059
chr1	16368141	16368566
chr1	16370403	16375447
chr1	16375708	16376183
chr1	16377994	16378587
chr1	16380470	16381958
chr1	16382127	16384558
chr1	16386578	16387340
chr1	16387846	16388655
chr1	16388812	16389723
chr1	16404095	16404784
chr1	16404810	16408073
chr1	16414910	16415422
chr1	16416081	16417201
chr1	16418440	16418859
chr1	16434941	16436641
chr1	16550595	16552292
chr1	16565983	16567364
chr1	16639180	16640540
chr1	16697884	16699140
chr1	16712111	16713696
chr1	16804509	16805117
chr1	16807286	16808019
chr1	16811518	16813394
chr1	16817698	16818236
chr1	16819098	16819723
chr1	16819873	16820706
chr1	16823036	16823781
chr1	16823873	16825455
chr1	16827334	16828138
chr1	16830165	16830618
chr1	16832006	16832583
chr1	16841855	16842295
chr1	16842648	16844841
chr1	16886333	16886875
chr1	16889986	16890937
chr1	16898489	16899480
chr1	16900628	16901210
chr1	16901334	16901875
chr1	16902053	16903423
chr1	16905874	16907576
chr1	16907640	16908257
chr1	16908608	16909492
chr1	16909552	16910310
chr1	16911056	16911690
chr1	16913100	16913600
chr1	16914282	16914837
chr1	16917734	16918346
chr1	16919902	16920400
chr1	16923065	16923569
chr1	16926400	16927315
chr1	17102069	17102575
chr1	17112352	17114544
chr1	17121908	17122615
chr1	17123725	17124274
chr1	17124498	17125145
chr1	17147354	17147804
chr1	17150529	17151166
chr1	17159495	17160450
chr1	17185954	17186431
chr1	17188796	17189286
chr1	17203287	17203818
chr1	17209642	17210270
chr1	17210273	17211241
chr1	17252247	17253570
chr1	17258604	17259110
chr1	17274807	17275333
chr1	17296509	17297008
chr1	17297556	17298214
chr1	17324772	17325341
chr1	17367191	17367625
chr1	17389002	17389497
chr1	17392417	17393586
chr1	17397611	17398244
chr1	17403288	17403836
chr1	17406524	17408899
chr1	17410912	17411580
chr1	17411598	17412305
chr1	17412836	17413310
chr1	17413579	17414276
chr1	17414441	17415077
chr1	17424692	17425988
chr1	17428016	17429000
chr1	17429091	17429642
chr1	17431164	17433487
chr1	17435407	17436954
chr1	17449342	17450265
chr1	17458589	17459028
chr1	17473174	17473733
chr1	17475386	17476378
chr1	17486260	17487072
chr1	17488528	17489106
chr1	17503630	17504096
chr1	17546662	17548491
chr1	17603220	17603674
chr1	17604821	17605782
chr1	17608373	17609020
chr1	17615455	17616031
chr1	17618536	17619461
chr1	17636669	17639404
chr1	17639476	17640180
chr1	17640615	17641072
chr1	17659161	17660054
chr1	17674584	17675586
chr1	17676473	17677058
chr1	17693127	17693856
chr1	17701252	17701883
chr1	17737917	17738389
chr1	17738425	17740173
chr1	17744307	17745122
chr1	17750254	17750688
chr1	17750721	17751438
chr1	17767995	17769703
chr1	17771085	17771532
chr1	17823592	17824478
chr1	17860749	17861250
chr1	17967429	17968177
chr1	18065457	18066026
chr1	18445397	18445970
chr1	18455267	18455951
chr1	18780265	18780864
chr1	18796283	18796911
chr1	18867744	18868478
chr1	18919113	18919712
chr1	19019309	19020417
chr1	19074191	19075048
chr1	19083148	19083755
chr1	19100948	19102564
chr1	19105910	19106447
chr1	19111951	19112844
chr1	19121152	19122561
chr1	19125376	19126841
chr1	19136350	19136939
chr1	19137439	19137972
chr1	19147461	19147976
chr1	19152577	19153102
chr1	19154432	19156271
chr1	19208774	19209373
chr1	19209705	19210705
chr1	19251544	19252124
chr1	19265085	19267028
chr1	19280171	19281103
chr1	19312540	19313287
chr1	19408442	19410040
chr1	19440226	19440824
chr1	19449923	19451739
chr1	19458484	19458964
chr1	19459143	19459909
chr1	19509708	19512396
chr1	19513186	19513667
chr1	19514204	19514767
chr1	19514847	19515321
chr1	19517163	19517693
chr1	19524114	19524699
chr1	19527503	19528098
chr1	19540165	19541283
chr1	19543307	19543931
chr1	19558483	19558971
chr1	19573198	19573892
chr1	19644795	19645379
chr1	19650418	19650999
chr1	19667320	19667913
chr1	19668387	19668984
chr1	19683464	19685902
chr1	19795569	19796914
chr1	19839278	19840464
chr1	19842000	19846282
chr1	19852501	19853151
chr1	19857891	19858490
chr1	19858591	19859294
chr1	19875368	19876100
chr1	19903331	19904161
chr1	19914497	19915277
chr1	19958375	19958900
chr1	19965033	19965531
chr1	19998158	19999829
chr1	20007972	20008569
chr1	20018633	20019150
chr1	20024225	20024766
chr1	20059918	20060570
chr1	20081062	20082337
chr1	20350886	20351922
chr1	20361298	20361848
chr1	20411930	20412720
chr1	20557745	20558439
chr1	20665638	20666183
chr1	20673964	20674534
chr1	20675314	20675963
chr1	20685125	20685865
chr1	20692739	20693656
chr1	20706619	20707736
chr1	20774048	20775740
chr1	20777626	20778153
chr1	20785938	20787039
chr1	20787518	20789350
chr1	20789375	20790219
chr1	20800334	20800934
chr1	20803537	20804121
chr1	20810684	20811979
chr1	20812493	20813680
chr1	20832140	20833235
chr1	20833461	20834337
chr1	20860007	20861326
chr1	20863048	20863594
chr1	20894976	20896626
chr1	20896649	20897406
chr1	20903345	20903944
chr1	20910911	20911514
chr1	20916330	20917777
chr1	20927447	20928046
chr1	20931368	20932912
chr1	20984808	20987464
chr1	21179874	21180414
chr1	21234026	21234505
chr1	21234628	21235138
chr1	21282239	21282840
chr1	21290011	21290576
chr1	21348876	21349587
chr1	21374662	21376812
chr1	21415936	21417374
chr1	21418715	21419207
chr1	21424301	21424848
chr1	21444218	21444809
chr1	21446225	21446762
chr1	21453391	21454812
chr1	21459895	21460384
chr1	21460431	21462487
chr1	21469033	21469748
chr1	21488868	21490171
chr1	21492513	21493063
chr1	21493512	21494581
chr1	21496003	21496550
chr1	21501684	21502601
chr1	21509516	21510085
chr1	21512034	21512661
chr1	21513182	21513684
chr1	21516162	21517689
chr1	21519597	21520280
chr1	21521107	21521991
chr1	21523081	21524854
chr1	21528146	21528868
chr1	21533175	21534284
chr1	21534550	21535347
chr1	21536216	21538631
chr1	21539159	21539743
chr1	21543534	21545611
chr1	21546186	21546772
chr1	21555002	21555725
chr1	21567528	21568242
chr1	21689903	21690516
chr1	21738840	21739915
chr1	21742582	21743252
chr1	21745186	21745992
chr1	21772868	21774155
chr1	21785558	21787237
chr1	21788769	21789368
chr1	21792878	21794902
chr1	21805889	21806481
chr1	21806498	21807708
chr1	21808012	21808513
chr1	21821593	21822455
chr1	21822670	21823210
chr1	21825557	21826679
chr1	21828045	21828927
chr1	21830657	21832994
chr1	21833547	21834506
chr1	21837600	21839273
chr1	21839641	21840144
chr1	21846739	21847571
chr1	21849330	21851143
chr1	21854468	21855386
chr1	21856483	21857000
chr1	21858040	21859338
chr1	21864217	21864682
chr1	21872353	21872909
chr1	21981316	21983510
chr1	22017423	22018006
chr1	22041688	22042146
chr1	22054637	22055342
chr1	22060669	22061683
chr1	22064491	22065030
chr1	22068574	22069706
chr1	22095675	22096514
chr1	22101173	22101719
chr1	22103262	22104195
chr1	22106121	22106677
chr1	22118388	22119124
chr1	22119633	22120231
chr1	22126771	22127614
chr1	22128962	22129497
chr1	22129838	22131241
chr1	22132578	22133216
chr1	22134484	22137331
chr1	22154929	22155471
chr1	22155530	22156791
chr1	22162842	22163516
chr1	22204485	22205044
chr1	22223852	22225679
chr1	22251266	22252824
chr1	22253156	22253709
chr1	22330836	22331471
chr1	22342326	22343161
chr1	22474808	22475399
chr1	22532025	22532680
chr1	22615523	22616187
chr1	22616437	22616959
chr1	22650543	22651774
chr1	22739381	22739942
chr1	22786256	22786843
chr1	22810361	22811187
chr1	22840874	22841660
chr1	22896798	22897370
chr1	22903431	22904166
chr1	22946411	22947056
chr1	22949186	22949895
chr1	22950120	22950763
chr1	23015357	23015908
chr1	23030581	23031694
chr1	23129170	23129841
chr1	23175224	23175827
chr1	23209413	23210335
chr1	23218039	23219666
chr1	23302036	23302584
chr1	23366306	23368268
chr1	23376385	23377389
chr1	23392862	23393452
chr1	23395610	23396560
chr1	23414734	23415307
chr1	23415609	23416934
chr1	23423816	23424845
chr1	23482091	23482586
chr1	23542594	23544707
chr1	23566441	23569109
chr1	23576309	23576810
chr1	23584132	23584651
chr1	23592707	23593206
chr1	23601824	23602519
chr1	23602651	23603509
chr1	23623415	23623980
chr1	23628561	23629033
chr1	23634863	23635315
chr1	23650912	23651455
chr1	23677799	23678545
chr1	23679612	23680063
chr1	23682465	23683534
chr1	23683639	23684159
chr1	23720584	23721270
chr1	23723635	23724643
chr1	23726963	23728086
chr1	23728213	23730999
chr1	23738730	23739503
chr1	23747765	23748261
chr1	23752709	23755064
chr1	23756953	23759256
chr1	23761217	23761882
chr1	23763641	23764112
chr1	23766679	23767298
chr1	23775919	23776518
chr1	23784481	23785293
chr1	23789372	23789912
chr1	23790270	23791545
chr1	23792028	23793275
chr1	23793782	23794410
chr1	23797825	23798267
chr1	23833514	23834856
chr1	23836420	23836937
chr1	23849281	23849773
chr1	23849996	23851049
chr1	23856480	23857098
chr1	23871998	23872679
chr1	23890426	23891588
chr1	23941828	23943476
chr1	23976826	23978279
chr1	23989070	23991368
chr1	23992360	23992887
chr1	23993199	23993798
chr1	23994996	23995594
chr1	23996901	23997466
chr1	23997638	24001083
chr1	24007030	24007572
chr1	24008701	24009263
chr1	24023876	24024876
chr1	24066554	24067871
chr1	24119120	24119642
chr1	24148181	24148782
chr1	24154023	24154731
chr1	24157839	24159658
chr1	24178612	24180310
chr1	24217509	24218386
chr1	24221447	24222403
chr1	24245175	24245774
chr1	24246053	24246769
chr1	24269784	24270464
chr1	24275092	24275637
chr1	24306421	24307445
chr1	24307662	24308430
chr1	24311259	24312084
chr1	24316703	24317320
chr1	24318347	24318841
chr1	24318842	24319911
chr1	24341505	24342498
chr1	24348656	24350120
chr1	24357002	24357591
chr1	24386368	24387087
chr1	24400917	24401637
chr1	24415353	24415853
chr1	24435108	24436494
chr1	24465314	24466250
chr1	24477801	24478279
chr1	24482258	24482964
chr1	24482970	24483809
chr1	24484256	24484928
chr1	24485481	24486080
chr1	24488852	24489624
chr1	24489914	24490609
chr1	24492413	24495070
chr1	24516077	24516625
chr1	24520961	24521491
chr1	24563139	24563662
chr1	24564209	24565174
chr1	24584197	24584765
chr1	24591354	24591858
chr1	24612103	24613112
chr1	24614129	24615957
chr1	24700668	24702900
chr1	24714472	24715169
chr1	24757499	24758087
chr1	24766821	24767408
chr1	24783078	24783607
chr1	24804501	24805072
chr1	24840608	24843528
chr1	24903474	24903961
chr1	24917915	24918706
chr1	24919009	24919631
chr1	24923341	24923915
chr1	24924282	24924755
chr1	24941432	24941987
chr1	24943698	24945448
chr1	24945622	24946285
chr1	25046726	25048106
chr1	25063546	25064064
chr1	25097148	25097735
chr1	25108532	25109154
chr1	25109650	25110986
chr1	25112958	25113826
chr1	25116321	25116839
chr1	25125821	25126372
chr1	25126531	25127006
chr1	25130874	25131892
chr1	25131897	25132451
chr1	25158300	25158865
chr1	25165128	25166316
chr1	25169135	25170501
chr1	25197675	25198308
chr1	25201905	25202672
chr1	25216344	25217360
chr1	25219919	25220489
chr1	25221388	25222573
chr1	25230985	25231581
chr1	25236892	25237362
chr1	25300498	25301135
chr1	25430828	25432638
chr1	25438506	25439599
chr1	25445232	25447400
chr1	25537200	25538164
chr1	25624588	25625186
chr1	25628790	25631108
chr1	25700691	25701251
chr1	25702681	25703246
chr1	25731555	25732075
chr1	25737280	25738121
chr1	25742113	25744246
chr1	25748175	25749549
chr1	25755192	25756599
chr1	25761502	25762100
chr1	25762596	25763169
chr1	25767256	25769270
chr1	25771683	25773870
chr1	25807471	25808114
chr1	25814597	25816388
chr1	25891503	25892126
chr1	25894246	25894905
chr1	25895036	25895612
chr1	25979604	25980100
chr1	25996768	25997443
chr1	25998706	26000273
chr1	26003341	26003845
chr1	26009697	26010536
chr1	26016883	26017479
chr1	26018452	26020760
chr1	26025629	26026126
chr1	26057655	26059203
chr1	26061718	26062159
chr1	26073700	26075563
chr1	26088617	26089209
chr1	26089450	26090155
chr1	26090651	26091210
chr1	26091393	26092141
chr1	26094363	26095022
chr1	26104334	26106402
chr1	26196489	26197798
chr1	26234091	26235964
chr1	26274474	26275073
chr1	26293663	26294292
chr1	26309592	26311888
chr1	26328177	26328792
chr1	26355484	26356157
chr1	26368463	26369687
chr1	26370591	26371137
chr1	26376152	26376786
chr1	26377005	26378142
chr1	26432531	26434328
chr1	26474672	26475165
chr1	26477734	26481318
chr1	26481514	26482186
chr1	26483083	26484732
chr1	26484785	26485384
chr1	26504750	26505845
chr1	26517154	26517599
chr1	26520315	26521105
chr1	26530421	26530881
chr1	26535461	26536356
chr1	26549557	26552281
chr1	26552597	26553867
chr1	26553970	26554511
chr1	26555016	26556956
chr1	26557631	26558522
chr1	26562792	26563391
chr1	26576872	26578062
chr1	26607447	26608194
chr1	26608274	26608755
chr1	26630834	26631937
chr1	26668688	26669220
chr1	26669579	26670081
chr1	26670281	26672688
chr1	26698917	26701089
chr1	26728132	26731336
chr1	26747113	26747564
chr1	26818963	26820999
chr1	26876369	26877084
chr1	26891449	26892756
chr1	26894086	26896767
chr1	26896811	26897509
chr1	26986327	26988670
chr1	26998619	26999307
chr1	27025092	27026459
chr1	27048247	27049156
chr1	27051988	27053246
chr1	27055115	27055584
chr1	27060759	27065248
chr1	27088452	27089995
chr1	27098876	27099906
chr1	27103300	27103829
chr1	27106450	27107149
chr1	27113113	27113703
chr1	27120419	27121652
chr1	27145980	27146616
chr1	27196641	27197394
chr1	27208517	27209352
chr1	27209775	27210647
chr1	27211248	27212195
chr1	27244914	27245448
chr1	27256974	27257457
chr1	27296361	27296976
chr1	27301517	27302413
chr1	27310748	27311821
chr1	27321554	27322270
chr1	27352752	27353632
chr1	27353650	27354645
chr1	27390975	27392356
chr1	27432824	27434094
chr1	27434227	27434645
chr1	27499695	27500365
chr1	27505825	27506710
chr1	27507186	27507681
chr1	27520831	27521918
chr1	27531751	27532293
chr1	27542066	27542852
chr1	27546288	27546863
chr1	27556367	27557140
chr1	27563984	27566799
chr1	27590523	27592492
chr1	27594422	27595052
chr1	27599377	27599988
chr1	27601318	27601999
chr1	27602404	27602985
chr1	27688498	27690140
chr1	27691393	27691939
chr1	27702956	27704788
chr1	27707162	27707742
chr1	27712564	27713070
chr1	27716833	27718119
chr1	27721859	27722369
chr1	27724282	27725011
chr1	27726191	27726790
chr1	27730752	27731481
chr1	27736568	27737576
chr1	27737710	27738339
chr1	27738685	27739159
chr1	27739278	27740412
chr1	27741195	27742687
chr1	27745929	27746496
chr1	27751875	27752489
chr1	27755668	27758216
chr1	27761760	27762244
chr1	27762449	27763609
chr1	27766968	27768567
chr1	27768743	27769411
chr1	27774906	27775461
chr1	27789028	27789508
chr1	27790171	27790690
chr1	27800754	27801307
chr1	27801373	27803542
chr1	27803724	27804323
chr1	27806541	27806993
chr1	27820436	27820984
chr1	27842735	27843430
chr1	27849132	27849573
chr1	27849578	27850164
chr1	27850215	27850725
chr1	27857701	27859759
chr1	27861684	27862235
chr1	27866514	27867228
chr1	27868202	27868887
chr1	27870977	27871846
chr1	27885600	27886208
chr1	27924001	27925907
chr1	27971818	27973198
chr1	28029398	28030743
chr1	28057119	28057651
chr1	28074261	28074762
chr1	28075594	28076129
chr1	28112909	28114488
chr1	28155016	28155527
chr1	28157378	28158122
chr1	28158371	28159789
chr1	28165644	28166237
chr1	28286890	28288166
chr1	28343549	28344215
chr1	28352165	28352850
chr1	28353882	28354406
chr1	28392621	28393467
chr1	28431419	28432429
chr1	28434637	28436288
chr1	28446139	28446821
chr1	28447917	28448456
chr1	28448477	28449152
chr1	28450476	28451009
chr1	28457789	28459880
chr1	28473682	28474245
chr1	28512743	28513687
chr1	28527006	28529113
chr1	28545022	28545720
chr1	28550468	28551613
chr1	28568375	28570264
chr1	28636828	28637509
chr1	28704379	28706347
chr1	28712301	28713147
chr1	28714017	28715610
chr1	28716937	28718738
chr1	28751381	28753046
chr1	28778925	28779385
chr1	28779892	28781855
chr1	28800812	28801382
chr1	28841322	28842739
chr1	28867455	28869154
chr1	28935249	28937014
chr1	28981051	28981566
chr1	29058072	29058611
chr1	29061624	29062185
chr1	29064968	29065563
chr1	29068198	29068727
chr1	29076041	29076721
chr1	29081009	29081637
chr1	29082696	29083425
chr1	29083442	29084602
chr1	29085265	29087627
chr1	29112882	29114922
chr1	29321293	29322679
chr1	29323232	29324555
chr1	29335527	29336046
chr1	29379884	29381583
chr1	29401809	29402589
chr1	29405592	29406117
chr1	29429472	29430512
chr1	29434953	29439068
chr1	29444555	29445443
chr1	29456517	29457186
chr1	29457309	29457896
chr1	29470666	29471252
chr1	29487356	29487937
chr1	29489802	29490397
chr1	29510200	29510776
chr1	29815268	29815921
chr1	29948960	29949585
chr1	29954273	29955694
chr1	30038533	30039206
chr1	30328863	30330312
chr1	30334328	30334903
chr1	30436175	30437363
chr1	30439753	30440796
chr1	30771345	30772312
chr1	30817774	30818368
chr1	30946125	30946746
chr1	30953221	30953981
chr1	30958636	30959342
chr1	30963409	30965436
chr1	30966574	30967342
chr1	30967428	30968231
chr1	30968669	30969268
chr1	30974618	30975298
chr1	30987652	30988251
chr1	31001822	31002860
chr1	31024840	31025526
chr1	31027747	31028312
chr1	31028350	31029299
chr1	31031656	31032567
chr1	31032627	31033136
chr1	31042944	31044467
chr1	31047061	31047802
chr1	31061774	31062342
chr1	31068548	31070204
chr1	31103399	31103904
chr1	31104111	31104854
chr1	31152652	31153450
chr1	31154178	31155260
chr1	31156617	31157399
chr1	31174809	31175354
chr1	31175859	31176760
chr1	31310250	31311837
chr1	31347651	31348577
chr1	31381323	31381971
chr1	31399804	31401415
chr1	31408022	31408550
chr1	31416040	31416857
chr1	31426564	31428343
chr1	31484435	31485537
chr1	31541599	31542943
chr1	31618242	31619455
chr1	31639782	31640846
chr1	31658095	31659865
chr1	31661567	31662258
chr1	31667686	31668555
chr1	31671729	31672358
chr1	31676975	31677785
chr1	31679274	31679862
chr1	31690219	31691097
chr1	31761800	31762414
chr1	31787178	31788157
chr1	31811893	31812671
chr1	31813164	31815862
chr1	31825736	31826797
chr1	31827354	31827844
chr1	31832048	31832642
chr1	31882211	31884084
chr1	31901895	31902450
chr1	31903491	31904012
chr1	31904181	31905275
chr1	31907640	31909025
chr1	31913201	31913682
chr1	31922105	31922636
chr1	31927722	31928798
chr1	31938754	31940241
chr1	31943166	31943757
chr1	31944392	31944973
chr1	31946602	31947102
chr1	31950646	31951212
chr1	31952428	31952944
chr1	31953095	31953933
chr1	31974289	31975016
chr1	31983646	31984292
chr1	31991729	31992576
chr1	32000882	32001656
chr1	32001731	32002263
chr1	32002524	32003259
chr1	32005332	32006018
chr1	32026038	32027697
chr1	32034318	32034968
chr1	32035623	32036118
chr1	32036493	32037697
chr1	32053747	32054631
chr1	32065243	32065692
chr1	32175270	32177332
chr1	32177524	32178616
chr1	32182267	32183804
chr1	32192639	32193838
chr1	32194078	32194742
chr1	32251308	32253399
chr1	32300705	32301217
chr1	32310553	32311977
chr1	32345810	32347214
chr1	32371550	32372046
chr1	32417307	32419219
chr1	32433714	32434237
chr1	32435239	32435769
chr1	32442988	32444687
chr1	32450083	32450682
chr1	32453688	32454200
chr1	32459819	32461401
chr1	32478100	32480116
chr1	32480638	32481112
chr1	32486164	32487080
chr1	32529826	32531264
chr1	32570796	32571345
chr1	32573152	32574732
chr1	32588652	32590829
chr1	32631894	32633546
chr1	32639010	32639660
chr1	32738280	32739466
chr1	32759290	32759821
chr1	32777181	32779003
chr1	32850219	32850781
chr1	32888222	32890189
chr1	32939571	32942600
chr1	32950124	32951016
chr1	32951308	32951772
chr1	32954582	32955325
chr1	32962974	32964189
chr1	32978585	32981354
chr1	32981727	32982318
chr1	32997154	33000339
chr1	33004007	33004567
chr1	33007511	33009233
chr1	33010810	33012643
chr1	33054776	33056943
chr1	33110687	33111363
chr1	33111557	33112156
chr1	33114657	33115384
chr1	33137672	33138440
chr1	33139141	33140362
chr1	33158999	33159553
chr1	33187036	33187583
chr1	33201137	33203435
chr1	33218164	33218830
chr1	33219344	33219943
chr1	33227202	33227894
chr1	33229685	33231573
chr1	33231974	33232504
chr1	33236986	33237676
chr1	33244213	33244826
chr1	33245116	33245920
chr1	33255700	33256383
chr1	33273978	33275635
chr1	33288557	33289213
chr1	33293305	33293984
chr1	33324410	33325092
chr1	33375808	33376548
chr1	33378190	33378850
chr1	33389182	33389719
chr1	33401489	33402418
chr1	33419056	33420763
chr1	33456724	33459898
chr1	33494507	33497018
chr1	33532727	33533235
chr1	33533422	33534121
chr1	33534206	33534754
chr1	33536543	33537554
chr1	33554632	33555231
chr1	33580147	33580676
chr1	33586733	33589108
chr1	33605208	33606633
chr1	33617119	33617701
chr1	33668215	33669535
chr1	33671828	33672500
chr1	33681703	33682409
chr1	33710396	33711440
chr1	33863071	33863593
chr1	33871160	33871951
chr1	33872894	33873543
chr1	34738492	34739172
chr1	34835819	34836495
chr1	34974787	34975433
chr1	34979337	34980365
chr1	34980602	34981469
chr1	34992885	34993798
chr1	34994130	34994799
chr1	34997582	34998304
chr1	34999222	34999863
chr1	35000988	35002046
chr1	35018028	35018617
chr1	35018675	35020783
chr1	35021531	35022356
chr1	35022776	35023497
chr1	35024391	35025224
chr1	35026195	35026734
chr1	35090728	35091609
chr1	35097098	35098361
chr1	35103193	35103762
chr1	35104349	35105098
chr1	35162826	35163605
chr1	35222957	35224048
chr1	35268967	35270400
chr1	35285341	35285885
chr1	35314624	35315218
chr1	35317063	35318284
chr1	35429774	35431816
chr1	35431834	35432402
chr1	35433003	35433529
chr1	35506480	35507851
chr1	35583547	35584161
chr1	35671770	35672319
chr1	35794823	35797274
chr1	35802563	35803708
chr1	35814250	35814921
chr1	35828875	35829474
chr1	35832361	35832929
chr1	35878857	35880358
chr1	35953538	35954677
chr1	35956010	35957742
chr1	36007159	36008704
chr1	36045527	36047383
chr1	36120795	36122380
chr1	36168208	36170184
chr1	36326014	36326518
chr1	36326562	36328188
chr1	36330372	36331017
chr1	36337657	36339008
chr1	36387052	36388333
chr1	36388500	36389513
chr1	36393152	36395607
chr1	36399133	36399656
chr1	36425886	36426863
chr1	36461781	36463385
chr1	36486389	36487062
chr1	36537988	36538733
chr1	36543894	36546899
chr1	36557416	36557924
chr1	36559607	36560588
chr1	36560916	36562300
chr1	36565656	36566205
chr1	36566913	36567440
chr1	36583164	36583733
chr1	36607148	36607771
chr1	36611814	36613581
chr1	36622990	36625506
chr1	36635303	36636517
chr1	36638578	36640348
chr1	36656124	36656602
chr1	36659237	36659826
chr1	36688212	36689248
chr1	36701487	36703216
chr1	36704549	36705070
chr1	36711910	36712547
chr1	36717212	36717688
chr1	36721137	36721682
chr1	36723679	36724262
chr1	36724620	36725693
chr1	36754396	36755071
chr1	36791941	36792540
chr1	36814206	36814650
chr1	36941827	36942408
chr1	37162244	37162850
chr1	37204270	37204903
chr1	37258711	37259310
chr1	37648779	37649484
chr1	37672262	37672939
chr1	37691794	37692537
chr1	37692973	37694186
chr1	37709252	37711204
chr1	37711397	37726068
chr1	37751795	37753679
chr1	37782627	37783190
chr1	37791627	37792813
chr1	37799554	37800576
chr1	37833500	37834598
chr1	37927688	37931514
chr1	38002325	38003064
chr1	38031526	38034347
chr1	38045443	38047772
chr1	38097032	38098863
chr1	38168470	38170577
chr1	38183761	38186189
chr1	38189155	38189892
chr1	38227392	38228956
chr1	38233839	38236673
chr1	38237034	38240220
chr1	38241609	38244664
chr1	38247112	38247907
chr1	38250325	38251856
chr1	38264009	38264711
chr1	38265186	38265994
chr1	38266133	38269280
chr1	38269462	38270165
chr1	38302440	38303096
chr1	38314127	38314868
chr1	38361435	38362088
chr1	38376656	38377304
chr1	39056259	39056858
chr1	39097037	39098676
chr1	39110849	39112241
chr1	39179311	39180555
chr1	39200659	39201249
chr1	39202254	39202756
chr1	39211845	39212444
chr1	39228860	39230482
chr1	39264076	39265489
chr1	39328319	39328937
chr1	39342884	39345108
chr1	39421715	39422735
chr1	39430192	39430909
chr1	39636695	39637350
chr1	39646123	39648163
chr1	39666142	39666691
chr1	39797182	39798247
chr1	39809182	39809764
chr1	39813428	39815596
chr1	39847651	39848485
chr1	39863482	39864023
chr1	39871218	39871783
chr1	39895898	39896743
chr1	39906256	39906841
chr1	39914987	39916152
chr1	39929235	39930605
chr1	39940147	39940676
chr1	39975747	39976276
chr1	39976771	39978136
chr1	40026693	40028399
chr1	40037105	40038510
chr1	40054646	40055471
chr1	40121172	40122074
chr1	40139202	40141187
chr1	40157778	40158323
chr1	40172376	40173205
chr1	40193202	40194910
chr1	40198523	40199204
chr1	40211572	40212162
chr1	40218665	40219295
chr1	40277666	40279905
chr1	40334871	40336037
chr1	40399217	40400521
chr1	40495584	40497125
chr1	40553282	40554485
chr1	40576882	40577481
chr1	40611698	40613167
chr1	40687829	40688871
chr1	40746418	40747817
chr1	40769517	40770465
chr1	40850625	40851265
chr1	40862929	40863959
chr1	40868803	40869363
chr1	40876600	40877166
chr1	40903526	40904462
chr1	40906847	40907536
chr1	40929427	40931212
chr1	41008789	41009294
chr1	41012366	41012965
chr1	41021340	41021876
chr1	41037526	41038145
chr1	41040218	41041307
chr1	41087745	41088769
chr1	41097566	41098304
chr1	41098644	41101433
chr1	41101817	41103208
chr1	41104132	41104891
chr1	41106938	41107745
chr1	41113807	41114396
chr1	41115714	41116540
chr1	41119383	41119945
chr1	41136343	41137134
chr1	41137450	41138027
chr1	41139843	41141107
chr1	41160745	41161263
chr1	41177834	41178343
chr1	41182414	41183038
chr1	41186718	41187423
chr1	41190428	41191261
chr1	41205599	41206657
chr1	41217115	41219476
chr1	41224276	41224894
chr1	41241939	41242543
chr1	41254060	41254627
chr1	41255495	41256285
chr1	41257749	41259555
chr1	41259664	41260438
chr1	41261470	41262910
chr1	41265978	41266470
chr1	41347577	41348525
chr1	41400091	41400556
chr1	41479249	41481305
chr1	41506323	41506882
chr1	41520865	41521451
chr1	41561003	41561584
chr1	41580169	41580934
chr1	41598989	41600271
chr1	41609798	41611315
chr1	41619153	41622234
chr1	41655150	41655909
chr1	41656729	41658101
chr1	41661561	41662611
chr1	41670219	41671851
chr1	41707354	41707951
chr1	41712636	41713693
chr1	41720103	41721390
chr1	41722343	41723409
chr1	41723654	41724556
chr1	41725805	41726344
chr1	41729551	41730069
chr1	41730417	41731047
chr1	41731058	41733000
chr1	41733035	41735986
chr1	41736171	41737841
chr1	41737849	41739419
chr1	41739462	41740751
chr1	41741712	41743120
chr1	41745381	41745946
chr1	41751611	41752247
chr1	41752419	41755237
chr1	41764622	41765170
chr1	41864295	41864787
chr1	41865174	41865726
chr1	41876695	41877237
chr1	41899487	41901775
chr1	41901782	41902316
chr1	41903133	41903708
chr1	41909531	41910112
chr1	41910342	41911247
chr1	41922111	41922890
chr1	42021185	42022037
chr1	42099612	42100211
chr1	42101057	42101776
chr1	42108095	42108927
chr1	42133638	42134235
chr1	42138502	42139763
chr1	42140300	42141082
chr1	42155962	42156893
chr1	42158062	42158770
chr1	42192592	42193291
chr1	42273755	42275115
chr1	42384908	42385587
chr1	42388776	42389375
chr1	42402689	42404867
chr1	42405690	42407105
chr1	42408926	42409525
chr1	42410551	42412130
chr1	42447868	42448823
chr1	42479689	42480310
chr1	42572341	42574428
chr1	42618950	42619593
chr1	42693878	42695578
chr1	42701145	42702307
chr1	42896051	42897558
chr1	42919674	42922041
chr1	42953930	42954552
chr1	42977182	42977898
chr1	42978025	42978624
chr1	42985220	42985785
chr1	42986877	42987513
chr1	43003996	43006266
chr1	43054722	43055863
chr1	43084290	43085897
chr1	43162140	43163645
chr1	43166056	43166740
chr1	43168622	43169757
chr1	43170045	43171155
chr1	43171769	43172323
chr1	43174109	43176797
chr1	43176861	43177524
chr1	43178329	43180799
chr1	43181243	43182110
chr1	43186197	43186876
chr1	43190908	43192056
chr1	43195271	43198104
chr1	43198616	43199182
chr1	43201490	43202391
chr1	43205107	43206051
chr1	43211453	43212034
chr1	43409774	43410942
chr1	43444874	43445597
chr1	43445806	43446415
chr1	43465313	43465869
chr1	43473765	43474464
chr1	43508605	43509064
chr1	43531388	43532781
chr1	43559487	43560468
chr1	43568537	43568982
chr1	43586408	43588191
chr1	43590248	43590713
chr1	43596047	43597957
chr1	43598342	43599319
chr1	43600976	43601536
chr1	43601735	43602321
chr1	43604209	43604743
chr1	43604854	43607391
chr1	43627331	43628699
chr1	43661139	43662659
chr1	43678625	43679103
chr1	43681019	43681751
chr1	43684386	43685061
chr1	43685085	43685823
chr1	43691183	43693156
chr1	43711054	43711694
chr1	43713722	43714264
chr1	43733483	43733980
chr1	43761182	43762023
chr1	43763992	43764860
chr1	43767331	43767858
chr1	43768703	43770447
chr1	43775924	43776402
chr1	43781928	43782472
chr1	43786133	43786732
chr1	43786902	43787387
chr1	43794885	43795402
chr1	43795744	43796314
chr1	43797267	43797866
chr1	43798257	43798884
chr1	43820283	43821110
chr1	43834540	43835013
chr1	43842117	43842613
chr1	43843567	43844144
chr1	43887443	43889328
chr1	43944077	43946712
chr1	44021224	44022325
chr1	44059729	44060867
chr1	44096704	44097218
chr1	44110462	44111026
chr1	44119954	44120548
chr1	44123266	44124277
chr1	44167630	44168362
chr1	44168387	44169344
chr1	44171276	44173559
chr1	44184032	44185813
chr1	44206495	44207094
chr1	44207614	44208820
chr1	44212122	44214619
chr1	44216769	44218676
chr1	44219060	44219755
chr1	44228371	44230792
chr1	44234117	44234736
chr1	44237497	44238083
chr1	44238517	44239078
chr1	44243872	44244516
chr1	44264124	44264578
chr1	44267095	44267612
chr1	44267675	44270248
[truncated: 47,459 more rows]
