# Supplementary material for: Diverse Roles and Interactions of the SWI/SNF Chromatin Remodeling Complex Revealed Using Global Approaches
Source: PLOS journal article supplement (doi:10.1371/journal.pgen.1002008), 2011-03-03
Supplement: S21 (10.1371/journal.pgen.1002008.s021) [file journal.pgen.1002008.s021]

Chromosome	Start	Stop
chr16	176000	177299
chr13	112809438	112810737
chr13	112468730	112470029
chr22	31055475	31056774
chr5	132035253	132036552
chr16	457314	458613
chr6	41710714	41712013
chr13	112727358	112728657
chr6	41809780	41811079
chr19	59077566	59078865
chr11	2116037	2117336
chr11	1851291	1852590
chr9	131153746	131155045
chr19	59622486	59623785
chr11	1867061	1868360
chr2	220200007	220201306
chrX	153466230	153467529
chr21	33696956	33698255
chr21	39606818	39608117
chr6	41502512	41503811
chr2	220081181	220082480
chr19	59156378	59157677
chr11	5438349	5439648
chrX	153332995	153334294
chr11	2016629	2017928
chr11	64166554	64167853
chrX	153338993	153340292
chr16	285782	287081
chr11	1815229	1816528
chr19	59093678	59094977
chr11	64268508	64269807
chr9	131215192	131216491
chr2	220094861	220096160
chr16	269784	271083
chr11	2100115	2101414
chrX	153256162	153257461
chr19	59177582	59178881
chr16	149704	151003
chr19	59385708	59387007
chrX	152912521	152913820
chr13	112810768	112812067
chr11	1849353	1850652
chr9	131206528	131207827
chr11	2173189	2174488
chr11	1924669	1925968
chr6	41713792	41715091
chr21	33936356	33937655
chr20	33667280	33668579
chr11	1891799	1893098
chr7	27205571	27206870
chr19	59176252	59177551
chr9	131117950	131119249
chr16	152668	153967
chr13	112359290	112360589
chr9	130954512	130955811
chr16	259828	261127
chr16	390928	392227
chr16	265376	266675
chr11	1971523	1972822
chr11	64130948	64132247
chr11	1856079	1857378
chr2	220203579	220204878
chr13	112645430	112646729
chrX	153015501	153016800
chr16	268264	269563
chr9	131037732	131039031
chr11	1959553	1960852
chr9	130903972	130905271
chr11	1946177	1947476
chr11	1821461	1822760
chr16	61810	63109
chr9	130889532	130890831
chr11	64289332	64290631
chr11	1715707	1717006
chr18	23986279	23987578
chr11	2146779	2148078
chr11	2174633	2175932
chr9	130838726	130840025
chr11	1749831	1751130
chr6	73924418	73925717
chr9	131180460	131181759
chrX	153535162	153536461
chr19	59470106	59471405
chr14	98766919	98768218
chr20	33338124	33339423
chr6	41854658	41855957
chr19	59927702	59929001
chr13	112391856	112393155
chr19	59174580	59175879
chr11	64412300	64413599
chrX	153328814	153330113
chr5	56146946	56148245
chr19	59363592	59364891
chr11	1741319	1742618
chr1	149697546	149698845
chr16	273090	274389
chr5	131859047	131860346
chrX	152804031	152805330
chr13	112662150	112663449
chr9	131137368	131138667
chr19	59836920	59838219
chr19	59206538	59207837
chr2	220129821	220131120
chr19	59618496	59619795
chr19	59375828	59377127
chr16	370636	371935
chr2	220124425	220125724
chr9	130951776	130953075
chr16	13626	14925
chr11	1854217	1855516
chr21	33321440	33322739
chr2	220208443	220209742
chr19	59153072	59154371
chr19	59446242	59447541
chr7	114349138	114350437
chr11	2181283	2182582
chr11	1898221	1899520
chr2	220144717	220146016
chrX	152828047	152829346
chr9	131027852	131029151
chr19	59184498	59185797
chr5	131374661	131375960
chr9	131199498	131200797
chr20	33652004	33653303
chr19	59104356	59105655
chr2	220038355	220039654
chr19	60019700	60020999
chr11	1995235	1996534
chr1	149749834	149751133
chr22	30670269	30671568
chr19	59941724	59943023
chr2	220007347	220008646
chr6	41673094	41674393
chrX	153412612	153413911
chr19	59637648	59638947
chr16	128234	129533
chr21	33021354	33022653
chrX	153392847	153394146
chr5	56282948	56284247
chr21	33314790	33316089
chr22	31527169	31528468
chr2	220075215	220076514
chr11	2014425	2015724
chrX	153269026	153270325
chrX	153437654	153438953
chrX	152937715	152939014
chr11	64420926	64422225
chr13	112812174	112813473
chr11	116194441	116195740
chr11	1757621	1758920
chr11	64266760	64268059
chr11	2139635	2140934
chrX	122922415	122923714
chr19	59958672	59959971
chr6	41846108	41847407
chr9	130921376	130922675
chrX	153278260	153279559
chrX	153223399	153224698
chr11	64301872	64303171
chr19	59663336	59664635
chrX	153499252	153500551
chr13	29893569	29894868
chr13	112602680	112603979
chr11	64376998	64378297
chrX	153427698	153428997
chr11	1746107	1747406
chr13	112743242	112744541
chr20	33592496	33593795
chr11	1731515	1732814
chr11	1961187	1962486
chrX	153226476	153227775
chr2	220077419	220078718
chr9	130872318	130873617
chr9	131195470	131196769
chrX	153520494	153521793
chr2	220033605	220034904
chr19	59183168	59184467
chrX	153500924	153502223
chr7	27249423	27250722
chrX	152835951	152837250
chr9	131201816	131203115
chr11	1841563	1842862
chr13	112596220	112597519
chr11	64160588	64161887
chr19	59063620	59064919
chr11	1754391	1755690
chr11	1913079	1914378
chr11	2122383	2123682
chr11	64313842	64315141
chr19	59357056	59358355
chr11	116212871	116214170
chr11	1966051	1967350
chr11	2246567	2247866
chr16	223766	225065
chr11	64244188	64245487
chr13	112753198	112754497
chr14	98871609	98872908
chr9	131138774	131140073
chr6	41518434	41519733
chr13	112724926	112726225
chr11	2192911	2194210
chr11	64370424	64371723
chr16	379034	380333
chr2	220086577	220087876
chr5	132110075	132111374
chr14	98825933	98827232
chr11	64154660	64155959
chr21	32706144	32707443
chr19	59900532	59901831
chr7	116098846	116100145
chr11	1803183	1804482
chr16	388648	389947
chr13	112703646	112704945
chr6	41759696	41760995
chr19	59415234	59416533
chrX	153433398	153434697
chr11	1904567	1905866
chr22	30910619	30911918
chr9	131062090	131063389
chr19	59472576	59473875
chr19	59972998	59974297
chr13	112787322	112788621
chrX	122820841	122822140
chr19	59667896	59669195
chr16	263704	265003
chrX	152800991	152802290
chr7	27113763	27115062
chr11	2279399	2280698
chr19	59868080	59869379
chr21	32880260	32881559
chr2	220018519	220019818
chr14	98781777	98783076
chr19	59297814	59299113
chrX	153271002	153272301
chr11	2248619	2249918
chr11	64062168	64063467
chr13	112683848	112685147
chr22	31257939	31259238
chr2	220061079	220062378
chr6	132313105	132314404
chr5	132019559	132020858
chrX	152780319	152781618
chrX	153439592	153440891
chrX	153309051	153310350
chrX	153324861	153326160
chr19	59404404	59405703
chr19	59155010	59156309
chr11	2010663	2011962
chr7	115952470	115953769
chr13	29779265	29780564
chrX	152861031	152862330
chr11	1847035	1848334
chr6	41752552	41753851
chr13	112387144	112388443
chr6	41670282	41671581
chr13	112758708	112760007
chr2	234394275	234395574
chr11	64427310	64428609
chr22	30699111	30700410
chr16	439454	440753
chr2	219997695	219998994
chr2	220126021	220127320
chr11	116019755	116021054
chr11	2108437	2109736
chr6	41607658	41608957
chr11	2003329	2004628
chr20	33487844	33489143
chr9	130999428	131000727
chr9	131203412	131204711
chr11	64429438	64430737
chr19	59866142	59867441
chr13	112696160	112697459
chr11	64413972	64415271
chr11	64326268	64327567
chr11	2144233	2145532
chrX	153252779	153254078
chr11	1906049	1907348
chrX	152797609	152798908
chr11	2277195	2278494
chr19	59332964	59334263
chr11	64247038	64248337
chr11	1927937	1929236
chr6	108688110	108689409
chr2	220083917	220085216
chr11	64216486	64217785
chr11	1725435	1726734
chr5	131656849	131658148
chr2	220016923	220018222
chr11	2110261	2111560
chrX	153389728	153391027
chr16	8838	10137
chr11	1830923	1832222
chr2	220115913	220117212
chr2	220120511	220121810
chr21	32887138	32888437
chr11	2008041	2009340
chr11	64432858	64434157
chrX	153407333	153408632
chr19	59779236	59780535
chr19	59676522	59677821
chr11	2051285	2052584
chr11	2006483	2007782
chr20	33668800	33670099
chr22	31466445	31467744
chr6	41622326	41623625
chr16	271114	272413
chr11	1934321	1935620
chr16	278296	279595
chrX	153237993	153239292
chr11	1919349	1920648
chr11	1953549	1954848
chr9	131194064	131195363
chrX	153313497	153314796
chr1	149609272	149610571
chrX	153397182	153398481
chr22	31259991	31261290
chr2	220201831	220203130
chr5	56240578	56241877
chr13	112825056	112826355
chr11	1809567	1810866
chr16	67054	68353
chr11	64080446	64081745
chrX	153344845	153346144
chr16	342364	343663
chr19	59302868	59304167
chr13	29607239	29608538
chr16	274420	275719
chr19	59137568	59138867
chr2	234404117	234405416
chr11	1813367	1814666
chr20	33611382	33612681
chr1	149850914	149852213
chr11	64425980	64427279
chr7	116569704	116571003
chr13	112578740	112580039
chrX	153889485	153890784
chr16	348786	350085
chr9	130742586	130743885
chr11	2141383	2142682
chrX	153266784	153268083
chr11	1868695	1869994
chr2	219991045	219992344
chr6	41712196	41713495
chr2	220049185	220050484
chr16	153998	155297
chr9	130737684	130738983
chr19	59658396	59659695
chr19	59674052	59675351
chr2	220213117	220214416
chr16	143396	144695
chr16	43494	44793
chr20	33633270	33634569
chr2	220055759	220057058
chr6	108603712	108605011
chr9	130900210	130901509
chr9	131122282	131123581
chr19	59091778	59093077
chr9	131222108	131223407
chr9	131033134	131034433
chrX	152844881	152846180
chr22	30581235	30582534
chr6	41833036	41834335
chr19	59307010	59308309
chr2	220044815	220046114
chr11	2124777	2126076
chr9	130948584	130949883
chr2	234382419	234383718
chr11	1957235	1958534
chr21	33707862	33709161
chr9	130825274	130826573
chr19	59047584	59048883
chr19	59412536	59413835
chrX	153026635	153027934
chr19	59079276	59080575
chr11	1964303	1965602
chr19	59185904	59187203
chr9	131184906	131186205
chr11	2286543	2287842
chr19	59437122	59438421
chr6	41567264	41568563
chr22	31512311	31513610
chr16	352396	353695
chr9	130861944	130863243
chr16	7470	8769
chr11	64435138	64436437
chr2	234367409	234368708
chr20	33604314	33605613
chr9	131218460	131219759
chr5	132140095	132141394
chr15	41694568	41695867
chr9	130911876	130913175
chr2	219989563	219990862
chrX	152793733	152795032
chr9	131152378	131153677
chr9	130987344	130988643
chr6	41577866	41579165
chr16	365582	366881
chr9	130975640	130976939
chr2	220057583	220058882
chr16	448232	449531
chr2	220019849	220021148
chr9	131056010	131057309
chr7	90477900	90479199
chr21	39682134	39683433
chr18	59787762	59789061
chr7	90063130	90064429
chr11	64367802	64369101
chr19	59632898	59634197
chr13	112733210	112734509
chr11	1915891	1917190
chr11	2132567	2133866
chr2	220205821	220207120
chr9	130813608	130814907
chr19	59799148	59800447
chr16	386900	388199
chr11	2253103	2254402
chrX	152781649	152782948
chrX	152871937	152873236
chr6	41770336	41771635
chr6	41645050	41646349
chr14	98809441	98810740
chr19	59539608	59540907
chr7	126819219	126820518
chr16	155404	156703
chr19	59290556	59291855
chr2	220143311	220144610
chr21	33773412	33774711
chr22	31253949	31255248
chr1	149527990	149529289
chr2	234364103	234365402
chr5	131828305	131829604
chr11	64418380	64419679
chr11	64265354	64266653
chr11	64401622	64402921
chr7	89711934	89713233
chrX	152822575	152823874
chr13	112565972	112567271
chrX	153243655	153244954
chr2	220101207	220102506
chr13	112819660	112820959
chr5	131622041	131623340
chr11	64320758	64322057
chr13	112670510	112671809
chr11	2169921	2171220
chr6	41545566	41546865
chr11	1805235	1806534
chr7	116749900	116751199
chr11	64356250	64357549
chr21	39642158	39643457
chr11	2104523	2105822
chrX	153249546	153250845
chr19	59435146	59436445
chr11	1822829	1824128
chr19	59534554	59535853
chr19	59631074	59632373
chr16	283198	284497
chr6	41481612	41482911
chr22	30479509	30480808
chr11	1858511	1859810
chr7	126678239	126679538
chr13	112713944	112715243
chr16	396856	398155
chr20	33607392	33608691
chrX	152831201	152832500
chr19	59712318	59713617
chr11	1992347	1993646
chr11	2237561	2238860
chr22	30693791	30695090
chr18	59753942	59755241
chr6	41732830	41734129
chr5	142129376	142130675
chrX	152930495	152931794
chr20	33334666	33335965
chr9	131157812	131159111
chr5	131853993	131855292
chr19	59316510	59317809
chr13	112418000	112419299
chr6	41590102	41591401
chr21	33313460	33314759
chr11	1941921	1943220
chr7	27102287	27103586
chr20	33345230	33346529
chr13	112427804	112429103
chr6	41729296	41730595
chr19	59628680	59629979
chr2	220089655	220090954
chr6	41803662	41804961
chr9	130815356	130816655
chr11	2284453	2285752
chr21	33881902	33883201
chr7	27179085	27180384
chr11	1895979	1897278
chrX	152802701	152804000
chrX	153353777	153355076
chrX	153230163	153231462
chr11	116210249	116211548
chr16	363492	364791
chr2	220109225	220110524
chrX	153367879	153369178
chr6	74217740	74219039
chr2	220085247	220086546
chr7	27241177	27242476
chr6	41517104	41518403
chr2	220430097	220431396
chr6	41674424	41675723
chr21	33785610	33786909
chr2	220021217	220022516
chr1	149520884	149522183
chr9	131004786	131006085
chr9	131208770	131210069
chr21	32762498	32763797
chr22	31720019	31721318
chrX	152798977	152800276
chr5	131836893	131838192
chr22	30475633	30476932
chr11	64177460	64178759
chr22	30985213	30986512
chr2	220059293	220060592
chr6	74160550	74161849
chr6	41639198	41640497
chr19	59076160	59077459
chr19	59561952	59563251
chr19	59402618	59403917
chrX	153444418	153445717
chr2	220135711	220137010
chr11	1993677	1994976
chr11	1899589	1900888
chr7	116289264	116290563
chr19	59908626	59909925
chr11	2097721	2099020
chr5	131675393	131676692
chrX	153236091	153237390
chr11	1902971	1904270
chr19	59406646	59407945
chr22	31200217	31201516
chr11	64312436	64313735
chr5	132193409	132194708
chr13	112443308	112444607
chr19	59449548	59450847
chr2	220236753	220238052
chr2	220111201	220112500
chr11	2138153	2139452
chr13	29604351	29605650
chr11	64278084	64279383
chrX	153285329	153286628
chr2	118332279	118333578
chr14	98883503	98884802
chr2	220197955	220199254
chrX	153422644	153423943
chr22	30356085	30357384
chrX	152789097	152790396
chr5	131860377	131861676
chr11	1998807	2000106
chr16	50372	51671
chr16	256066	257365
chr16	6140	7439
chrX	152785449	152786748
chr21	33618904	33620203
chrX	153347315	153348614
chr5	132025677	132026976
chr8	119259810	119261109
chr13	112692626	112693925
chr18	24009117	24010416
chr21	34153982	34155281
chr19	59627160	59628459
chr19	59172566	59173865
chr6	41447184	41448483
chr7	117299874	117301173
chr13	112750576	112751875
chr5	131429343	131430642
chr5	131626335	131627634
chr9	130913206	130914505
chr6	108546978	108548277
chr2	234347231	234348530
chr9	131216522	131217821
chr11	1951497	1952796
chr13	112705128	112706427
chr7	126679835	126681134
chr9	130983012	130984311
chr2	220025815	220027114
chr1	149604750	149606049
chr15	41983064	41984363
chr7	89953310	89954609
chr21	33065092	33066391
chr1	149565762	149567061
chr11	116148347	116149646
chr5	132031833	132033132
chr11	64121106	64122405
chr2	220040217	220041516
chr11	1948343	1949642
chr16	253672	254971
chr19	59117162	59118461
chr13	112597550	112598849
chr2	220133963	220135262
chr11	1818003	1819302
chrX	153105371	153106670
chr7	90731360	90732659
chrX	153062963	153064262
chr16	344264	345563
chr9	130749578	130750877
chr5	131413725	131415024
chr19	59062100	59063399
chrX	152783207	152784506
chr22	31243689	31244988
chr11	1835445	1836744
chr14	98924771	98926070
chr11	2135151	2136450
chr20	33348080	33349379
chr11	1982999	1984298
chr21	34330264	34331563
chr16	367254	368553
chr11	131065265	131066564
chr16	52500	53799
chr19	59492754	59494053
chr11	64323836	64325135
chr6	41659338	41660637
chr2	220180475	220181774
chr7	27214881	27216180
chr19	59664932	59666231
chrX	153292625	153293924
chrX	152877979	152879278
chr9	130968990	130970289
chr9	131072654	131073953
chr21	39738526	39739825
chr11	1816559	1817858
chrX	152911191	152912490
chrX	153536606	153537905
chrX	152863007	152864306
chr6	41816240	41817539
chr11	2264617	2265916
chr6	74241718	74243017
chr22	31185245	31186544
chr21	33740808	33742107
chr19	59312748	59314047
chr11	64416746	64418045
chr18	24011017	24012316
chr22	31713749	31715048
chr9	131064712	131066011
chr11	2292585	2293884
chr16	72754	74053
chr11	64281428	64282727
chr2	220065791	220067090
chr6	41857090	41858389
chr6	41766346	41767645
chr13	112760076	112761375
chr11	1973271	1974570
chr11	64165072	64166371
chrX	153228149	153229448
chr11	2158863	2160162
chrX	152852975	152854274
chr2	234391767	234393066
chr19	59086838	59088137
chrX	152825881	152827180
chr2	220220945	220222244
chr1	149529776	149531075
chr9	131081204	131082503
chr11	2148831	2150130
chr19	59774790	59776089
chr9	130910052	130911351
chr5	132028223	132029522
chr11	64360202	64361501
chr14	98807693	98808992
chr2	234498724	234500023
chr19	59157784	59159083
chr5	131774117	131775416
chr12	38904316	38905615
chr11	64362482	64363781
chr19	59811080	59812379
chr11	2130287	2131586
chr9	131115594	131116893
chr9	130843248	130844547
chr11	2239841	2241140
chr13	112641706	112643005
chr16	25887382	25888681
chr11	2062761	2064060
chr11	1793189	1794488
chr11	64047842	64049141
chrX	153258157	153259456
chr11	2074693	2075992
chr7	27244825	27246124
chr19	59096376	59097675
chr13	112398240	112399539
chr11	1852811	1854110
chr22	30937295	30938594
chrX	153294107	153295406
chr11	64331132	64332431
chr5	131452713	131454012
chr15	41825174	41826473
chr22	30340695	30341994
chr2	234419431	234420730
chr6	41781546	41782845
chr6	41623656	41624955
chrX	153417020	153418319
chrX	152935283	152936582
chr11	1936335	1937634
chr13	112798418	112799717
chr9	131142612	131143911
chr20	33613092	33614391
chr9	130939008	130940307
chr22	30769221	30770520
chr5	131620711	131622010
chr11	64105184	64106483
chr20	33598196	33599495
chr11	2274725	2276024
chr1	149531562	149532861
chr19	59913072	59914371
chrX	122911433	122912732
chr6	41640566	41641865
chr22	30160651	30161950
chr6	41562742	41564041
chr9	131162562	131163861
chr11	2118469	2119768
chr6	41579690	41580989
chr6	41682556	41683855
chr11	1811923	1813222
chr9	131145728	131147027
chr6	41605112	41606411
chr11	64327598	64328897
chr11	1990865	1992164
chr11	64132354	64133653
chr19	59499898	59501197
chr11	2120749	2122048
chr9	130884744	130886043
chr11	2155291	2156590
chr19	59563282	59564581
chr11	64239514	64240813
chr19	59380540	59381839
chr14	98574905	98576204
chr7	126457155	126458454
chr9	130891052	130892351
chr13	112796024	112797323
chr11	64341696	64342995
chr11	64431376	64432675
chr11	64269990	64271289
chr6	41533748	41535047
chr11	1832481	1833780
chr6	108544584	108545883
chr11	64123424	64124723
chr19	59451068	59452367
chr19	59114502	59115801
chr19	59827800	59829099
chr14	98711363	98712662
chr19	59417362	59418661
chr11	2157039	2158338
chr21	34278546	34279845
chr16	395526	396825
chr11	64190608	64191907
chr11	2179915	2181214
chr20	33354654	33355953
chr11	64091504	64092803
chr19	59395208	59396507
chr13	112374528	112375827
chr14	98806325	98807624
chr16	261804	263103
chr22	31553769	31555068
chr7	27170573	27171872
chr2	234396251	234397550
chr7	126774835	126776134
chr13	112451820	112453119
chr11	64351994	64353293
chr19	59119518	59120817
chrX	153533680	153534979
chr19	59115832	59117131
chr11	131062225	131063524
chr6	41679478	41680777
chr6	41750006	41751305
chr22	30697781	30699080
chr7	27148495	27149794
chr16	187172	188471
chr16	218826	220125
chr16	58010	59309
chr16	78644	79943
chr11	64155990	64157289
chr19	59378830	59380129
chr20	33328244	33329543
chr19	59339804	59341103
chr11	1827275	1828574
chr16	360794	362093
chr16	415894	417193
chr21	34349226	34350525
chr13	112744876	112746175
chr2	118487205	118488504
chr2	220107477	220108776
chr21	33560308	33561607
chr11	1860221	1861520
chr11	64276450	64277749
chr6	41665152	41666451
chr2	220014111	220015410
chr5	131437589	131438888
chr11	1914447	1915746
chr11	2171251	2172550
chr2	220043485	220044784
chr11	63999658	64000957
chr7	27225863	27227162
chr9	131113124	131114423
chr16	313218	314517
chr11	1987711	1989010
chr11	116037425	116038724
chr11	1737215	1738514
chr11	64236930	64238229
chrX	153300722	153302021
chr13	112701480	112702779
chr21	34124684	34125983
chrX	153443088	153444387
chr19	59384302	59385601
chr6	41662340	41663639
chr9	130956298	130957597
chr11	64329498	64330797
chr15	41757496	41758795
chr2	220072859	220074158
chr13	112781888	112783187
chr7	27167229	27168528
chr13	112718846	112720145
chr16	170566	171865
chr2	220079737	220081036
chr9	130978756	130980055
chr11	1712515	1713814
chr11	1828681	1829980
chr19	59350254	59351553
chr11	64279756	64281055
chr9	130882882	130884181
chrX	153343515	153344814
chr21	33523486	33524785
chr7	27107987	27109286
chr13	112822510	112823809
chr9	130829530	130830829
chr19	59834032	59835331
chr14	98695707	98697006
chr22	30354527	30355826
chrX	153114947	153116246
chr2	220209849	220211148
chr11	116204435	116205734
chr2	220031363	220032662
chr5	131389291	131390590
chr7	127019137	127020436
chrX	153246544	153247843
chr22	30853695	30854994
chr11	1975551	1976850
chr11	2114517	2115816
chr11	64242858	64244157
chr11	2004697	2005996
chr22	31407393	31408692
chr1	149437550	149438849
chr9	131128400	131129699
chr6	41636272	41637571
chrX	153387563	153388862
chrX	152875053	152876352
chr19	59135972	59137271
chr11	1744397	1745696
chr13	112707142	112708441
chr22	31606171	31607470
chr11	1996603	1997902
chr21	33464586	33465885
chr2	220122297	220123596
chrX	153259639	153260938
chr5	131295393	131296692
chr22	31528841	31530140
chr22	31600699	31601998
chr16	75756	77055
chr20	33715692	33716991
chr6	74287090	74288389
chr5	131350303	131351602
chr19	59347480	59348779
chr20	33341278	33342577
chr16	354448	355747
chr19	59713838	59715137
chr6	74065474	74066773
chr7	127015527	127016826
chr11	2106917	2108216
chr9	130870798	130872097
chr9	130897322	130898621
chr14	98888291	98889590
chr11	2000783	2002082
chr11	64315248	64316547
chr9	130809466	130810765
chrX	153371451	153372750
chrX	152846629	152847928
chr11	64117762	64119061
chrX	153484508	153485807
chr15	41879286	41880585
chr22	31640333	31641632
chr9	130873990	130875289
chr11	2168325	2169624
chr22	31461353	31462652
chr21	32811404	32812703
chr21	34266234	34267533
chr6	108502404	108503703
chr13	112831022	112832321
chr6	41525578	41526877
chr9	130950408	130951707
chr13	112412300	112413599
chr16	287226	288525
chr6	41861612	41862911
chr15	41607738	41609037
chr9	131223742	131225041
chrX	152940603	152941902
chr22	30215029	30216328
chr9	131083408	131084707
chr7	116594024	116595323
chr11	1820131	1821430
chr21	33326836	33328135
chr21	39476744	39478043
chr11	1752415	1753714
chr16	357640	358939
chr16	61096513	61097812
chr19	59210984	59212283
chr20	33670472	33671771
chr16	56224	57523
chr11	64262770	64264069
chr11	2152555	2153854
chr11	63972868	63974167
chr13	112665190	112666489
chrX	153330752	153332051
chr13	112807956	112809255
chr7	27251057	27252356
chr21	32764778	32766077
chr21	33227922	33229221
chr9	131131136	131132435
chr16	54248	55547
chr7	127012373	127013672
chr5	132176613	132177912
chr21	33496544	33497843
chr14	98628371	98629670
chr16	276776	278075
chr13	112681758	112683057
chr9	130905302	130906601
chr16	401150	402449
chr2	220177967	220179266
chrX	152823943	152825242
chr11	2070171	2071470
chr11	1801131	1802430
chrX	153175747	153177046
chr6	41650636	41651935
chr21	34174996	34176295
chr6	41528960	41530259
chr11	2077771	2079070
chrX	152903021	152904320
chrX	152948963	152950262
chr13	29880155	29881454
chrX	153077783	153079082
chr21	33249582	33250881
chr2	220356681	220357980
chr9	131135582	131136881
chr2	220371539	220372838
chr1	149607828	149609127
chr9	131020784	131022083
chr7	27150623	27151922
chr11	2290913	2292212
chr19	59067306	59068605
chrX	152865705	152867004
chr7	27136449	27137748
chr11	63964584	63965883
chrX	153068207	153069506
chr6	41758366	41759665
chr6	41633916	41635215
chrX	153515250	153516549
chr11	1938311	1939610
chr22	31104343	31105642
chr13	112530214	112531513
chr5	131635227	131636526
chrX	153365712	153367011
chrX	153643956	153645255
chr19	59109524	59110823
chrX	152932167	152933466
chr9	130860500	130861799
chr2	219999253	220000552
chr16	485548	486847
chr11	1723687	1724986
chr9	130957742	130959041
chr11	1780877	1782176
chr11	1930559	1931858
chr11	1955563	1956862
chr22	30695539	30696838
chr2	220093531	220094830
chr13	112697642	112698941
chr2	220098661	220099960
chrX	153415424	153416723
chr11	1728855	1730154
chr11	63968080	63969379
chr6	41588620	41589919
chr19	59564612	59565911
chrX	153264161	153265460
chrX	153435564	153436863
chr22	31010217	31011516
chr13	112575776	112577075
chr2	234421711	234423010
chr11	64089072	64090371
chrX	153340703	153342002
chr11	2267239	2268538
chrX	153201131	153202430
chr2	234371893	234373192
chr13	112691258	112692557
chr22	31478415	31479714
chr9	131120876	131122175
chr7	27093737	27095036
chr13	29627417	29628716
chr9	130823526	130824825
chr11	1845325	1846624
chr19	59322590	59323889
chr5	131591071	131592370
chr16	26131684	26132983
chr2	220312753	220314052
chr5	132188469	132189768
chrX	153001821	153003120
chr16	290304	291603
chr11	64424004	64425303
chr11	2112769	2114068
chr6	41715122	41716421
chr11	1989231	1990530
chr11	64009766	64011065
chr9	131123726	131125025
chrX	153241489	153242788
chr9	130886454	130887753
chr6	108596112	108597411
chr21	32869088	32870387
chr6	108563394	108564693
chrX	153348684	153349983
chr5	131436145	131437444
chr22	30928365	30929664
chr2	220041585	220042884
chrX	153061215	153062514
chr5	131630971	131632270
chr9	131144284	131145583
chr21	33474390	33475689
chr20	33318402	33319701
chr18	59767128	59768427
chr7	127026669	127027968
chr11	2066371	2067670
chr14	98769351	98770650
chr5	132181059	132182358
chr9	131155950	131157249
chr11	1907379	1908678
chrX	153059353	153060652
chr20	33560044	33561343
chr7	89621000	89622299
chr5	132024309	132025608
chr11	63960328	63961627
chr19	59369140	59370439
chrX	153225032	153226331
chr11	2186337	2187636
chr6	41763078	41764377
chr9	131084890	131086189
chr6	41842498	41843797
chr6	74129580	74130879
chr13	112689890	112691189
chr7	114176238	114177537
chr11	116138467	116139766
chr16	166120	167419
chr2	220102689	220103988
chr13	112466602	112467901
chr19	59651556	59652855
chr5	131415245	131416544
chr16	258080	259379
chrX	152906441	152907740
chr22	31056843	31058142
chrX	152966747	152968046
chr19	59308682	59309981
chr11	64235144	64236443
chrX	153350622	153351921
chr9	131025648	131026947
chr9	131159446	131160745
chr11	64403104	64404403
chr11	64366244	64367543
chr11	64290738	64292037
chr16	162320	163619
chrX	153143941	153145240
chr20	33653334	33654633
chr11	64383762	64385061
chr19	59835438	59836737
chr14	98881337	98882636
chr22	30932127	30933426
chr13	112591204	112592503
chr16	493262	494561
chr9	131039138	131040437
chr20	33506160	33507459
chr16	453134	454433
chr22	30901727	30903026
chr11	64115596	64116895
chr21	33395768	33397067
chr11	64150252	64151551
chr11	64205466	64206765
chrX	153631796	153633095
chr11	2234825	2236124
chr5	132199603	132200902
chr19	59192858	59194157
chr2	234627051	234628350
chr2	220279161	220280460
chr19	59317992	59319291
chr19	59776956	59778255
chr16	252076	253375
chr16	372080	373379
chr11	64415302	64416601
chr9	130947064	130948363
chr1	149526508	149527807
chr7	126919425	126920724
chr20	33321708	33323007
chr11	116233733	116235032
chr22	31454323	31455622
chr22	31399375	31400674
chr1	149723766	149725065
chrX	152885351	152886650
chr5	131352203	131353502
chrX	153968227	153969526
chr13	112776720	112778019
chr9	130953182	130954481
chr9	130901958	130903257
chr13	112734730	112736029
chr11	63963026	63964325
chr11	64113848	64115147
chr9	131204818	131206117
chr11	1985811	1987110
chr22	31530437	31531736
chr19	59084026	59085325
chr2	220069401	220070700
chr11	1943327	1944626
chr22	30221831	30223130
chr9	131150972	131152271
chr6	74029222	74030521
chr11	116102367	116103666
chr13	112655082	112656381
chr11	131034675	131035974
chr2	220024067	220025366
chr11	2092781	2094080
chr1	149493030	149494329
chr5	131817247	131818546
chr6	108385478	108386777
chr22	31305477	31306776
chr21	34284588	34285887
chr11	64174230	64175529
chr7	27158147	27159446
chr11	2085751	2087050
chr6	41548454	41549753
chr16	399592	400891
chr11	64138282	64139581
chrX	153938625	153939924
chr13	112716338	112717637
chr9	130942998	130944297
chr11	1730185	1731484
chr9	130772796	130774095
chr11	116081809	116083108
chr9	130907354	130908653
chr22	30349511	30350810
chr16	71424	72723
chr16	74274	75573
chr2	220092125	220093424
chr19	59304806	59306105
chr11	64333070	64334369
chr5	131632339	131633638
chr11	64249546	64250845
chr14	98570269	98571568
chr11	64349752	64351051
chr9	131086828	131088127
chr11	1969965	1971264
chr9	130804944	130806243
chr19	59513844	59515143
chr11	2282249	2283548
chr11	64253384	64254683
chr19	59635558	59636857
chr13	112688560	112689859
chr16	250708	252007
chr13	112680238	112681537
chr15	41596528	41597827
chr16	172732	174031
chr11	64354160	64355459
chr1	149779208	149780507
chr6	41565820	41567119
chr19	59343262	59344561
chrX	152890253	152891552
chr2	234390247	234391546
chr13	112765624	112766923
chr16	60442	61741
chr11	1901641	1902940
chr21	33364798	33366097
chr7	27119463	27120762
chr13	112544540	112545839
chr19	59723224	59724523
chr11	1843919	1845218
chr19	59992986	59994285
chr5	131787835	131789134
chr22	31357499	31358798
chr11	130864207	130865506
chr22	30599551	30600850
chr15	41691946	41693245
chr11	64069920	64071219
chrX	152850619	152851918
chr6	41569810	41571109
chr6	41600210	41601509
chr13	112338580	112339879
chr11	1967419	1968718
chr19	59621042	59622341
chr6	41444562	41445861
chr19	59065710	59067009
chr18	23737227	23738526
chrX	152869619	152870918
chr1	149751392	149752691
chr5	132229319	132230618
chr19	59235494	59236793
chr22	30897471	30898770
chr1	149762032	149763331
chr5	131576555	131577854
chrX	153261881	153263180
chr20	33749968	33751267
chr19	59480746	59482045
chr9	130811822	130813121
chr19	59483254	59484553
chr19	59838440	59839739
chr5	142358668	142359967
chr5	131457577	131458876
chr9	130984342	130985641
chr19	59656762	59658061
chrX	153363697	153364996
chr11	2280729	2282028
chr6	41735566	41736865
chr16	279778	281077
chr11	1755797	1757096
chr21	34188866	34190165
chr16	26067350	26068649
chr2	220170063	220171362
chr11	63981228	63982527
chr20	33336072	33337371
chr19	59102798	59104097
chr7	27218605	27219904
chr20	33630192	33631491
chr11	1791821	1793120
chr20	33626506	33627805
chr2	220250661	220251960
chr6	41680884	41682183
chr7	27257441	27258740
chr19	59796868	59798167
chr9	130981112	130982411
chr6	108559594	108560893
chr16	299538	300837
chrX	153477896	153479195
chr16	431702	433001
chr13	112570874	112572173
chr11	64283556	64284855
chr7	115926402	115927701
chr16	346506	347805
chrX	153290760	153292059
chr16	25870548	25871847
chr11	2136557	2137856
chr11	131058273	131059572
chr11	1739875	1741174
chr11	2226199	2227498
chr19	59373586	59374885
chrX	152888885	152890184
chr19	59654862	59656161
chrX	153952495	153953794
chr7	90024560	90025859
chr13	112805676	112806975
chr1	149603382	149604681
chr7	115637374	115638673
chr19	59074222	59075521
chrX	152882007	152883306
chr14	98609219	98610518
chr11	116029027	116030326
chr11	1909621	1910920
chr16	359464	360763
chr13	112347092	112348391
chr20	33605644	33606943
chr13	112779988	112781287
chr21	33374450	33375749
chr22	31369735	31371034
chr16	461380	462679
chr11	1738545	1739844
chr5	131419083	131420382
chr22	30263099	30264398
chrX	153190567	153191866
chr11	64436468	64437767
chr7	27116005	27117304
